# Supplementary material
Source: Springer Nature journal article supplement (https://www.springermedizin.de/resource/supplementary/12889_2005_334_MOESM1_ESM.pdf/9501304)

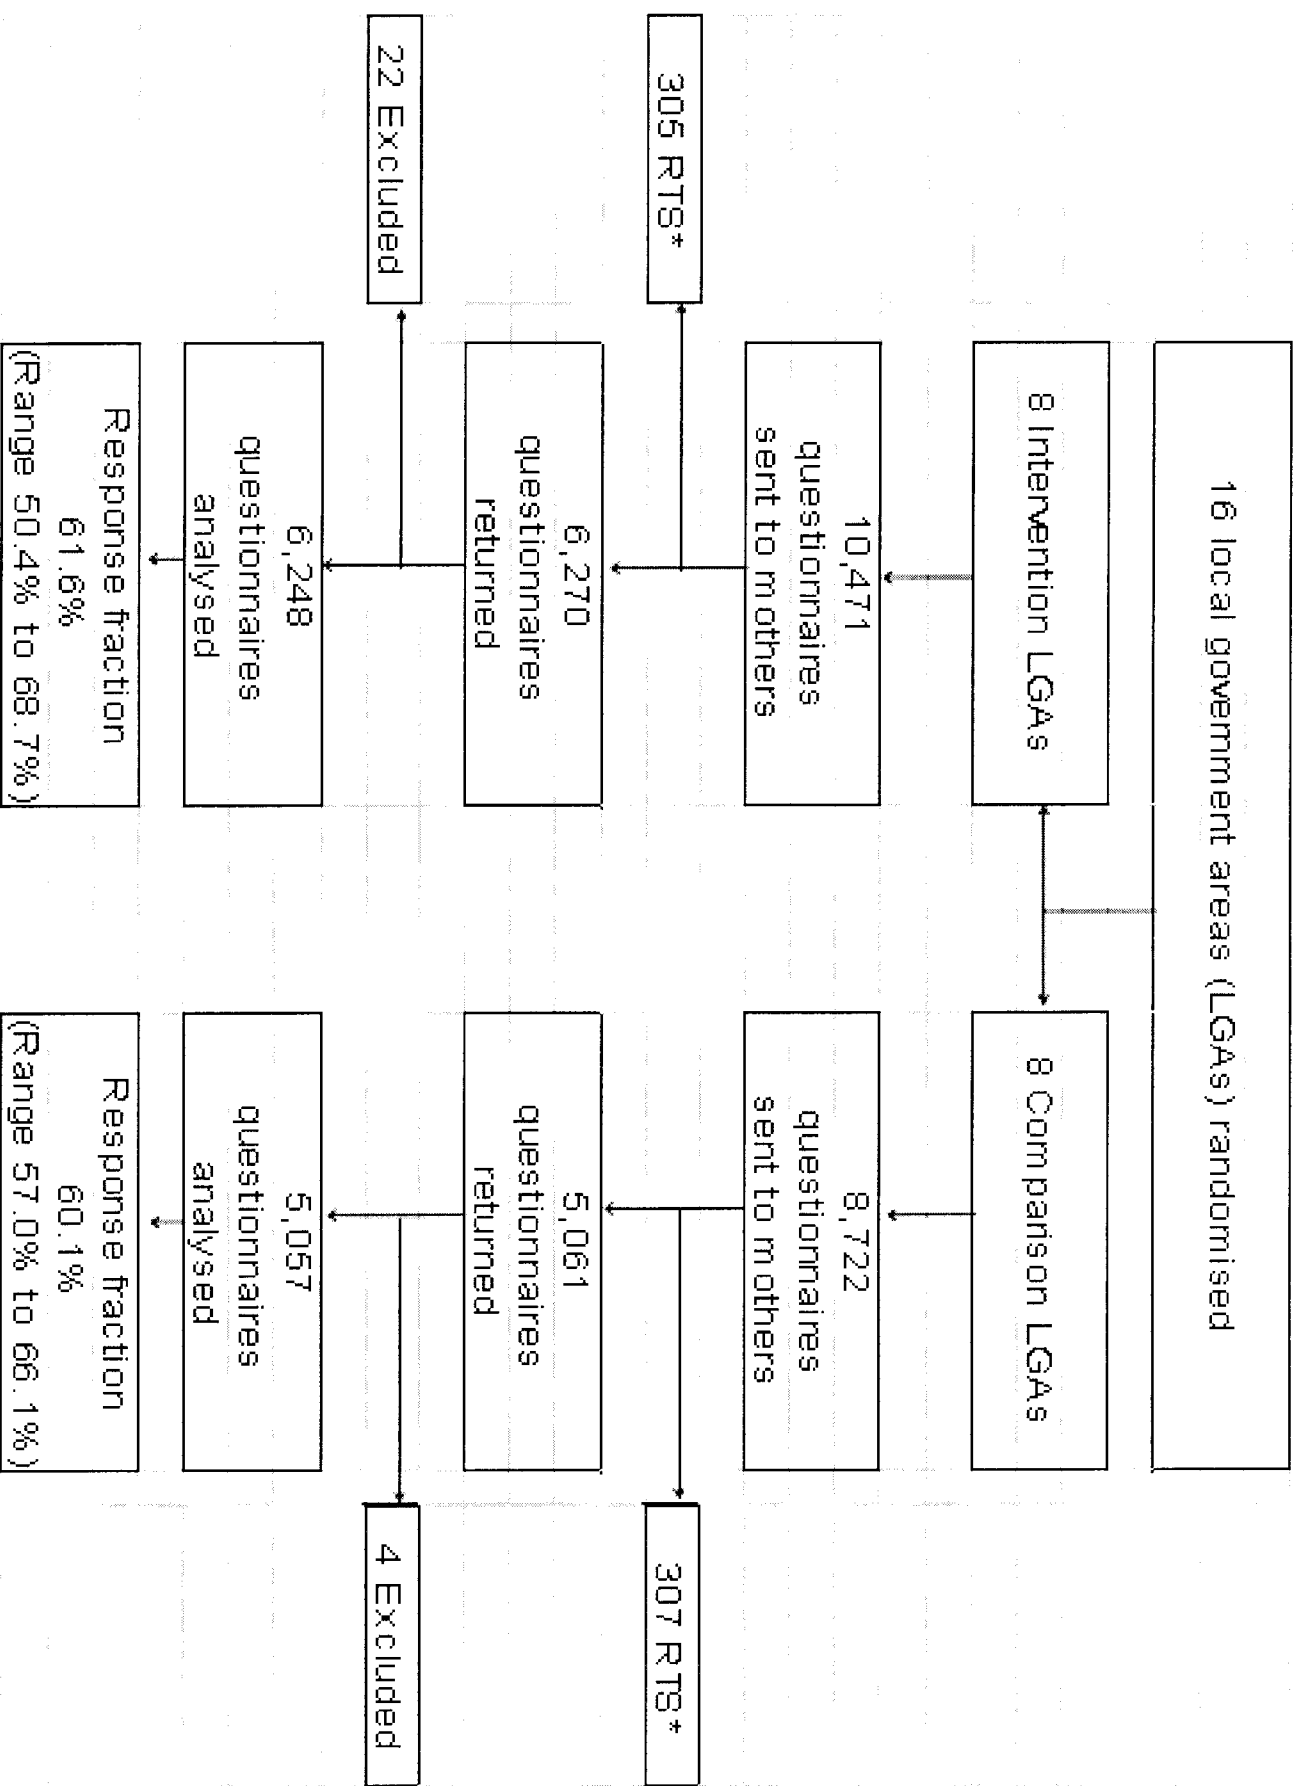

\*RTS: return to sender

Supplement: MOESM1 [file 9501304]
